# Supplementary material for: Non-muscle myosin II drives vesicle loss during human reticulocyte maturation
Source: PubMed Central journal article supplement — Haematologica. 2018 Aug 3;103(12):1997–2007. doi: 10.3324/haematol.2018.199083 (PMC6269291; doi:10.3324/haematol.2018.199083), 2018-12
Supplement: 2018_199083-Disclosures_and_Contributions.pdf [file 2018_199083-Disclosures_and_Contributions.pdf]

Haematologica  
HAEMATOL/2018/199083  
Version 3

Non-muscle Myosin II drives vesicle loss during human reticulocyte  
maturation

Pedro L. Moura, Bethan R. Hawley, Tosti J. Mankelow, Rebecca E.  
Griffiths, Johannes G. G. Dobbe, Geert J. Streekstra, David J. Anstee,  
Timothy J. Satchwell, and Ashley M. Toye

Disclosures: None

Contributions: PLM performed the majority of experiments, analysed data and prepared figures, BRH and TJS performed experiments, TJM and REG contributed confocal imaging data under supervision of DJA. JGGD and GJS provided essential ARCA equipment and analysis software. PLM, TJS and AMT conceived and designed experiments and wrote the manuscript. TJS and AMT contributed equally to conception and supervision of the work. All authors read and edited the manuscript.
